# Supplementary material
Source: PubMed Central journal article supplement (PMC7866320)
Supplement: tpmd200973.SD1.pdf [file tpmd200973.SD1.pdf]

**Supplemental Table 1: Literature search strategy**

|                   | <b>PubMed</b>                                                                                                                                   | <b>Embase</b>                                                                                                 |
|-------------------|-------------------------------------------------------------------------------------------------------------------------------------------------|---------------------------------------------------------------------------------------------------------------|
| <b>Search Set</b> |                                                                                                                                                 |                                                                                                               |
| <b>1</b>          | Post mortem or autopsy or necropsy or AUTOPSY                                                                                                   | AUTOPSY                                                                                                       |
| <b>2</b>          | hiv or human immunodeficiency virus or aids or HIV or HIV INFECTIONS                                                                            | HUMAN IMMUNODEFICIENCY VIRUS INFECTION or HUMAN IMMUNODEFICIENCY VIRUS or ACQUIRED IMMUNE DEFICIENCY SYNDROME |
| <b>3</b>          | tb or tuberculosis or TUBERCULOSIS or MYCOBACTERIUM TUBERCULOSIS or MYCOBACTERIUM AVIUM-INTRACELLULARE INFECTION OR MYCOBACTERIUM AVIUM COMPLEX | tb or TUBERCULOSIS or ATYPICAL MYCOBACTERIUM or ATYPICAL MYCOBACTERIOSIS or MYCOBACTERIUM AVIUM COMPLEX       |
| <b>4</b>          | africa or sub saharan africa or africa of the south OR AFRICA                                                                                   | AFRICA                                                                                                        |
| <b>5</b>          | <b>Sets 1 to 4 are combined with “and”</b>                                                                                                      | <b>Sets 1 to 4 are combined with “and”</b>                                                                    |

Capital letters represent MeSH terms.

**Supplemental Table 2: Quality assessment checklist**

| <b>QUALITY ASSESSMENT CHECKLIST</b>                                                                                                       |                     |    |         |
|-------------------------------------------------------------------------------------------------------------------------------------------|---------------------|----|---------|
| <b>Selection of study participants</b>                                                                                                    | <b>Risk of Bias</b> |    |         |
| Study describes that general hospital admissions were invited to participate (i.e. not restricted to speciality-specific ward admissions) | Yes                 | No | Unclear |
| Study describes that <i>consecutive</i> deaths were invited to participate                                                                | Yes                 | No | Unclear |
| Study describes selection procedure and criteria for inclusion / exclusion                                                                | Yes                 | No | Unclear |
| <b>Assessment</b>                                                                                                                         | <b>Risk of Bias</b> |    |         |
| Study describes characteristics of subjects including age                                                                                 | Yes                 | No | Unclear |
| Study describes type of autopsy performed                                                                                                 | Yes                 | No | Unclear |
| Study describes that >1 organ was autopsied                                                                                               | Yes                 | No | Unclear |
| Study describes that full autopsy (including chest, abdomen & brain) was performed                                                        | Yes                 | No | Unclear |
| Study describes method of confirming TB or NTM at autopsy                                                                                 | Yes                 | No | Unclear |
| Study describes that TB diagnosed at autopsy was confirmed by culture (in at least a subset of cases)                                     | Yes                 | No | Unclear |
| Study describes that NTM diagnosed at autopsy was confirmed by culture (in at least a subset of cases)                                    | Yes                 | No | Unclear |
| <b>Quality</b>                                                                                                                            | High/medium/low*    |    |         |

\*Studies were considered 'high quality' if they scored at least 70% of points, 'medium quality' if they scored 40–69% of points, and 'low quality' if they scored below 40% of points. 1 point was given if the study met the quality assessment question, 0.5 point was given if the study was unclear, and 0 point was given if the study did not meet the quality assessment question.
